# Supplementary material
Source: publisher figshare collection journal article supplement (https://acs.figshare.com/ndownloader/files/7842523)
Supplement: Supplementary file 1 [file 7842523]

Compound	Smiles	Ki D2SR [nM]	[35S]GTPgS: EC50 D2SR Go1 [nM]	[35S]GTPgS: ECmax D2SR Gao1 [% of quinpirole]	BRET-based: EC50 D2SR Gao1 [nM]	BRET-based: ECmax D2SR Gao1 [% of quinpirole]	�-arrestin-2 PathHunter EC50 D2SR [nM]	�-arrestin-2 PathHunter ECmax D2SR [% of quinpirole]	Comments
1a	O=C1CCC2=CC=C(C=C2N1)OCCCCN(CC3)CCN3C4=C(Cl)C(Cl)=CC=C4	0.45	39	67	8.7	81	n.d.	<10	n.d. = not determined
6a	ClC1=C(C(N2CCN(CCCC(NC3=CC4=CC=NN4C=C3)=O)CC2)=CC=C1)Cl	7.8	240	50	n.a.	n.a.	n.d.	<10	n.a. = not applicable
6b	O=C(NC1=CC2=CC=NN2C=C1)CCCN(CC3)CCN3C4=CC=CC=C4OC	36	630	38	n.a.	n.a.	n.d.	<10
7a	O=C(CCCN1CCN(C2=C(Cl)C(Cl)=CC=C2)CC1)NC3=CC4=C(C=O)C=NN4C=C3	0.41	13	43	n.a.	n.a.	n.d.	<10
7b	O=C([H])C1=C(N(N=C1)C=C2)C=C2NC(CCCN(CC3)CCN3C4=CC=CC=C4OC)=O	1.5	150	41	n.a.	n.a.	n.d.	<10
8a	O=C(CCCN1CCN(C2=C(Cl)C(Cl)=CC=C2)CC1)NC3=CC4=C(/C=N/O)C=NN4C=C3	0.5	600	47	n.a.	n.a.	n.d.	<10
8b	O/N=C([H])/C1=C(N(N=C1)C=C2)C=C2NC(CCCN(CC3)CCN3C4=CC=CC=C4OC)=O	0.52	470	37	n.a.	n.a.	n.d.	<10
9a	O=C(CCCN1CCN(C2=C(Cl)C(Cl)=CC=C2)CC1)NC3=CC4=C(C#N)C=NN4C=C3	0.52	870	50	n.a.	n.a.	n.d.	<10
9b	N#CC1=C(N(N=C1)C=C2)C=C2NC(CCCN(CC3)CCN3C4=CC=CC=C4OC)=O	0.55	84	32	n.a.	n.a.	n.d.	<10
12a	COC1=C(N2CCN(CCCCOC(C=C3)=CN4C3=CC=N4)CC2)C=CC=C1	0.74	4.1	30	1.5	81	n.d.	<10
12b	COC1=C(C=CC=C1)N(CC2)CCN2CCCCOC3=CC4=CC=NN4C=C3	14	42	48	n.a.	n.a.	n.d.	<10
12c	O=C(OCC)C1=NN(C=C2)C(C=C2OCCCCN(CC3)CCN3C4=C(OC)C=CC=C4)=C1	7.4	190	37	n.a.	n.a.	n.d.	<10
12d	OCC1=NN(C=C2)C(C=C2OCCCCN(CC3)CCN3C4=C(OC)C=CC=C4)=C1	5.8	73	47	n.a.	n.a.	n.d.	<10
12e	O=CC1=NN(C=C2)C(C=C2OCCCCN(CC3)CCN3C4=C(OC)C=CC=C4)=C1	5.5	88	46	n.a.	n.a.	n.d.	<10
12f	COC1=C(C=CC=C1)N2CCN(CC2)CCCCOC3=CC4=CC(/C=N/O)=NN4C=C3	1.9	400	35	n.a.	n.a.	n.d.	<10
12g	N#CC1=NN(C=C2)C(C=C2OCCCCN(CC3)CCN3C4=C(OC)C=CC=C4)=C1	12	1400	42	n.a.	n.a.	n.d.	<10
(S)-13a	CCCN([C@@H]1CC(C=CC=C2O)=C2CC1)CCCCOC(C=C3)=CN4C3=CC=N4	0.75	2	95	0.13	98	3	93
(R)-13a	CCCN([C@H]1CC(C=CC=C2O)=C2CC1)CCCCOC(C=C3)=CN4C3=CC=N4	48	n.a.	n.a.	1.7	98	218	51
(S)-13b	CCCN([C@@H]1CC(C=CC=C2O)=C2CC1)CCCCOC3=CC4=CC=NN4C=C3	0.7	4.9	102	0.12	99	1.3	97
(R)-13b	CCCN([C@H]1CC(C=CC=C2O)=C2CC1)CCCCOC3=CC4=CC=NN4C=C3	39	n.a.	n.a.	1.5	95	161	49
14a	COC1=CC=CC=C1N2CCN(CCCCOC3=CN4C(C=C3)=C(C([H])=O)C=N4)CC2	7.7	5.9	38	2.6	84	n.d.	<10
14b	O=C([H])C1=C2N(N=C1)C=CC(OCCCCN3CCN(C4=C(OC)C=CC=C4)CC3)=C2	2.3	17	58	n.a.	n.a.	n.d.	<10
(S)-15a	CCCN([C@@H]1CC(C=CC=C2O)=C2CC1)CCCCOC(C=C3)=CN4C3=C(C([H])=O)C=N4	0.94	n.a.	n.a.	0.13	99	3	97
(S)-15b	CCCN([C@@H]1CC(C=CC=C2O)=C2CC1)CCCCOC3=CC4=C(C([H])=O)C=NN4C=C3	0.9	n.a.	n.a.	0.11	99	2.9	96
16a	COC1=CC=CC=C1N2CCN(CC2)CCCCOC3=CN4C(C=C3)=C(C=N4)C=NO	1.7	2.9	57	2.9	82	n.d.	<10
16b	COC(C=CC=C1)=C1N(CC2)CCN2CCCCOC3=CC4=C(/C([H])=N/O)C=NN4C=C3	0.72	3.4	47	1.8	86	n.d.	<10	s-trans isomer
16c	O/N=C(C1=C2C=C(OCCCCN3CCN(CC3)C4=C(OC)C=CC=C4)C=CN2N=C1)\[H]	0.094	0.74	50	2.5	77	n.d.	<10	s-cis isomer
(S)-17a	CCCN([C@@H]1CC(C=CC=C2O)=C2CC1)CCCCOC(C=C3)=CN4C3=C(C([H])=NO)C=N4	0.84	n.a.	n.a.	0.19	99	1.5	99
(S)-17b	CCCN([C@@H]1CC(C=CC=C2O)=C2CC1)CCCCOC3=CC4=C(/C([H])=N/O)C=NN4C=C3	0.87	n.a.	n.a.	0.21	101	1.7	105
18	COC1=C(N2CCN(CCCCOC3=CC4=C(C#N)C=NN4C=C3)CC2)C=CC=C1	0.16	13	47	n.a.	n.a.	n.d.	<10
